# 1 **A repressor-decay timer for robust temporal patterning in embryonic** 2 ***Drosophila* neuroblast lineages**

3  
4 Inna Averbukh<sup>1,\*</sup>, Sen-Lin Lai<sup>2,\*</sup>, Chris Q. Doe<sup>2^</sup> and Naama Barkai<sup>1^</sup>

5  
6 <sup>1</sup>Department of molecular genetics, Weizmann institute of science, Rehovot, Israel

7 <sup>2</sup>Howard Hughes Medical Institute, Institute of Neuroscience, Institute of Molecular Biology,  
8 Department of Biology, University of Oregon, Eugene, OR 97403 USA

9  
10 \*co-first authors

11 ^corresponding [naama.barkai@weizmann.ac.il](mailto:naama.barkai@weizmann.ac.il), [cdoe@uoregon.edu](mailto:cdoe@uoregon.edu)

## 12 13 14 15 **Abstract**

16 **Biological timers synchronize patterning processes during embryonic development. In the**  
17 ***Drosophila* embryo, neural progenitors (neuroblasts; NBs) produce a sequence of unique**  
18 **neurons whose identities depend on the sequential expression of temporal transcription**  
19 **factors (TTFs). The stereotypy and precision of the NB lineages indicate reproducible temporal**  
20 **progression of the TTF timer. To examine the basis of this robustness, we combine theory and**  
21 **experiments. The TTF timer is commonly described as a relay of activators, but its regulatory**  
22 **circuit is also consistent with a repressor-decay timer, in which expression of each TTF begins**  
23 **once its repressor is sufficiently reduced. We find that repressor-decay timers are more robust**  
24 **to parameter variations compared to activator-relay timers. This suggests that the *in-vivo* TTF**  
25 **sequence progresses primarily by repressor-decay, a prediction that we support**  
26 **experimentally. Our results emphasize the role of robustness in the evolutionary design of**  
27 **patterning circuits.**

## 28 29 30 **Introduction**

31 Multicellular organisms shape their body plans during embryonic development through parallel  
32 processes that occur at different spatial positions and different times. Spatial coordination of  
33 patterning depends on direct cell-cell communication and long-range signaling by secreted  
34 morphogens. By contrast, temporal coordination is often achieved through cell-autonomous  
35 processes that measure time-delays (Pourquie, 1998). Molecular circuits implementing  
36 biological timers have been described (Murray, 2004; Reppert and Weaver, 2002; Simon et al.,  
37 2001), but the basis for their robust functioning is not well understood.

38 Biological timers play a key role in central nervous system (CNS) development of invertebrates  
39 and mammals, where a small pool of progenitors generates a vast amount of neuronal diversity  
40 (Grosskortenhaus et al., 2005; Isshiki et al., 2001; Kambadur et al., 1998; Kohwi and Doe, 2013;  
41 Kohwi et al., 2011; Li et al., 2013). In *Drosophila*, NBs delaminate from a ventral neuroectoderm  
42 at embryonic stages 9-11 to form an orthogonal two-dimensional grid with 30 NBs per half-  
43 segment. After formation, each NB undergoes asymmetric cell divisions every ~45 minutes to  
44 produce a series of ganglion mother cells (GMCs), each of which divides into two post-mitotic  
45 neurons. The identity of each neuron is determined by the spatial position of the parental NB  
46 and by the TTF it inherits at the time of birth (Doe, 2017; Kohwi and Doe, 2013; Pearson and  
47 Doe, 2004). Temporal information is therefore conveyed by the NB cell-intrinsic timer, which  
48 drives the sequential expression of four TTF: Hunchback (Hb), Krüppel (Kr), Pdm (Flybase:  
49 Nubbin and Pdm2), and Castor (Cas) (Brody and Odenwald, 2000; Isshiki et al., 2001; Kambadur  
50 et al., 1998).

51 The molecular basis of the NB TTF timer has been previously characterized: Hb expression is  
52 initiated by an external signal, but subsequent dynamics depends on cross-regulation between  
53 the TTFs themselves (Cleary and Doe, 2006; Grosskortenhaus et al., 2006; Isshiki et al., 2001;  
54 Tran et al., 2010). In addition, the orphan nuclear hormone receptor, Seven-up (Svp), is required  
55 to switch off Hb expression, but not for specifying early neuronal fates (Kanai et al., 2005; Kohwi  
56 et al., 2011; Mettler et al., 2006; Tran et al., 2010) .

57 The TTF expression sequence is largely independent of the cell cycle: Some NBs undergo just  
58 one cell division during the Hb expression window, whereas others undergo two or three  
59 divisions (Baumgardt et al., 2009; Doe, 2017; Isshiki et al., 2001). Furthermore, mutations that  
60 arrest the cell cycle still allow normal TTF expression from Kr onwards, and NBs can undergo the  
61 entire expression sequence when cultured in isolation in vitro (Brody and Odenwald, 2002;  
62 Grosskortenhaus et al., 2005; Kambadur et al., 1998). This indicates that the synchrony of the  
63 TTF timer with the cell cycle, needed to ensure reproducible NB lineage, is achieved by limiting  
64 the temporal variations in these two largely independent processes.

65 We hypothesize that reliable progression of the TTF cascade derives from the cell-intrinsic ability  
66 of the TTF timer to buffer variation (noise) in its molecular parameters. To identify the basis of  
67 this robustness, we used theoretical and experimental approaches. The TTF-timer is commonly  
68 described as a relay of activators (Doe, 2017; Rossi et al., 2017). Its regulatory circuit, however,  
69 contains also reactions compatible with a repressor-decay timer, in which TTFs progression  
70 depends on the decay of repressors. The relative contributions of the activator-relay and the  
71 repressor-decay interactions to TTF progression depend on unknown molecular parameters. To  
72 distinguish the *in-vivo* parameter values, we computationally screened millions of parameter  
73 sets for consistency with reported phenotypes and for the ability to buffer parameter variations.  
74 We find that decay timers are significantly more robust than relay timers. Based on that, we  
75 predicted and subsequently verified that *in-vivo* TTF expression timing depends primarily on  
76 repressor decay. We conclude that NB temporal patterning in *Drosophila* is driven by a robust  
77 timer primarily encoded by repressor decay, while activator relay plays a minor role.

## 78 Results

79

### 80 The TTF regulatory circuit combines activator-relay and repressor-decay Interactions

81 The sequential expression of TTFs within the dividing NB is commonly described as a relay of  
82 activators, in which each activator accumulates until reaching a threshold needed for inducing  
83 the next activator in the cascade (Doe, 2017; Rossi et al., 2017). Examining the TTF regulatory  
84 circuit, however, we noted that in addition to these activator-relay interactions, the regulatory  
85 circuit includes two additional interaction types: backward interactions, whereby a TTF inhibits  
86 the expression of a TTF upstream in the cascade, and repressor-decay interactions, whereby an  
87 upstream regulator represses the expression of downstream TTF (**Figure 1A-B**). Therefore, at  
88 least in principle, the TTF timer can progress not only through a relay of activators, but also  
89 through decay of repressors, where target genes are induced once a repressor decays below  
90 some threshold level.

91 The activator-relay and repressor-decay reactions could both contribute to the progression of  
92 the TTF timer. Alternatively, one timer type could dominate. The relative contribution of the  
93 different reactions to the initiation of TTFs expression depends on the *in-vivo* parameters,  
94 whose values are not known and are difficult to measure. We therefore examined whether the  
95 *in-vivo* parameters can be distinguished computationally.

96 We formulated a model of the TTF timer that includes all experimentally described interactions,  
97 capturing their strengths by 17 independent parameters such as TTF production and  
98 degradation rates (Supplemental Information). The model is summarized by four ordinary  
99 differential equations (ODEs), whose solution simulates the temporal dynamics of the four TTFs.  
100 Expression thresholds define the minimal TTF expression levels required for transmission of this  
101 factor to the NB progenitors (Supplemental Information).

102 To define parameters consistent with the *in-vivo* dynamics, we compiled phenotypes of mutant  
103 embryos, focusing on the best characterized NB7-1 lineage (**Figure 1C-D**). Available data  
104 describes which TTF(s) are expressed by the dividing NB, within the GMCs, and by the post-  
105 mitotic neurons. This data is of low temporal resolution, and cannot be used to define the  
106 precise durations at which each TTF is expressed. Still, this data provides the basic constraints  
107 with which our model should comply: the temporal sequence at which TTFs are expressed in our  
108 simulations should be consistent with the number of NB divisions, GMCs or post-mitotic  
109 neurons, reported for wild type, mutant, and misexpression embryos.

110 Screening over millions of parameters, each defining a different circuit, we detected a large  
111 number of parameter sets that were consistent with the reported phenotypes (**Figure 1E-F**). To  
112 examine if these consistent sets favor an activator-relay or a repressor-decay timer, we focused  
113 on the last two TTFs (Pdm and Cas) for which activating and repressing interactions were  
114 described, and examined how their induction time changes when specifically removing either  
115 the activator-relay or the repressor-decay interaction (**Figure 1G**). These values – the changes in  
116 TTFs induction times when removing either the activator-relay or the repressor-decay

117 interactions - positioned each consistent circuits within the relay-decay timer space (**Figure 1H**),  
118 defining the significance of two respective timers in the circuit.

119 We observed a higher density of consistent circuits in the region of repressor-decay timers.  
120 However, a large number of consistent circuits were equally dependent on both the relay and  
121 the decay interactions, and some were driven primarily by relay (**Figure 1H**). We conclude that  
122 the available data is not of sufficient resolution to distinguish whether the *in-vivo* parameters  
123 progress the TTF timer through an activator-relay or a repressor-decay timer.

124

### 125 **A repressor-decay timer is more robust than an activator-relay timer**

126 To obtain better resolution, we next added robustness criteria to our model. In support of this,  
127 we had previously shown that time delays measured by protein decay are more robust than  
128 time delays measured by protein accumulation (Rappaport et al., 2005). The reason for this  
129 differential robustness is easily appreciated: the time at which a protein decays between two  
130 thresholds is only moderately (logarithmically) sensitive to the values of these thresholds (**Figure**  
131 **2A-C**). By contrast, the time to increase protein levels between two thresholds depends at least  
132 linearly, and typically significantly stronger, on thresholds values (**Figure 2A-C**).

133 We added the robustness criteria to our numerical screen, assigning each consisted circuit a  
134 robustness score based on its ability to buffer the temporal durations at which each TTF is  
135 expressed against moderate (~20%) variations in TTF production rates (see Methods) Examining  
136 the parameter sets that showed high robustness, we noted that they typically gave larger  
137 weights to the repressor-decay interactions compared to the activator-relay ones, suggesting  
138 that the more robust circuits progress the TTF timer through the repressor decay, rather than  
139 activator accumulation (data not shown).

140 To more rigorously distinguish whether robustness correlates with a specific timer type, we  
141 considered again the positioning of all circuits in the decay-relay timer space (**c.f. Figure 1H**),  
142 and color-coded the circuits by their robustness score (**Figure 2D,E**). High robustness scores  
143 were found in the region of repressor-decay timers, while activator-relay timers were  
144 significantly less robust. We conclude that also in the context of the full model, robustness is  
145 improved when progressing through repressor decay rather than activator relay.

146

### 147 **A TTF circuit can be positioned in the relay-decay timer space based on TTF-deletion** 148 **phenotypes**

149 We hypothesized that robust circuits, with improved ability to buffer variations in parameters,  
150 were favored in evolution. We therefore predicted that the *in-vivo* TTF timer is robust, and is  
151 thereby driven by a decay timer. To test this hypothesis, we searched for experiments that could  
152 distinguish properties of the *in-vivo* timer.

153 Experimentally, TTF deletion is the most accessible perturbation. As described above, the  
154 consequences of such perturbations were previously reported, but at a resolution that was too

155 low to distinguish between the two timer types. Our simulations pointed to one limitation of  
156 existing data: for some mutants, the consequence of TTF deletion was defined by measuring the  
157 fates of the post-mitotic neurons, and therefore did not provide conclusive data about possible  
158 co-expression phases in which two consecutive TTFs are expressed within the NB, but one of  
159 them dominates in generating neuronal identity. This significantly limited our ability to precisely  
160 deduce the TTF expression timing in either wild-type or mutant embryos, and thereby greatly  
161 increased the spectrum of circuits that were scored as consistent with measured phenotypes.

162 With this in mind, we examined computationally whether the consequences of TTFs deletions, if  
163 analyzed at higher resolution, could distinguish between the repressor-decay and activator-relay  
164 timers. First, we examined how Pdm induction time changes following deletion of either Hb (its  
165 repressor) or Kr (its activator). Specifically, for each consistent circuit, as described in **Figure 1H**  
166 and **2E** above, we tested how Pdm induction time changes when simulating the removal of Hb  
167 and when simulating the removal of Kr (**Figure 3A**). These two values allowed us to uniquely  
168 position each consistent circuit within the Hb-Kr sensitivity space (**Figure 3B**). Further, using the  
169 robustness value of each consistent circuit, we could color the consistent sets positioned on the  
170 Hb-Kr sensitivity space by their robustness score (**Figure 3B**). As can be appreciated, high  
171 robustness was found exclusively in circuits for which Pdm induction was dependent only on Hb  
172 decay. Analogous analysis of Cas induction time shows a similar, although less pronounced bias  
173 (**Figure S1**). We conclude that measuring the change in Pdm induction time following Hb and Kr  
174 deletion can distinguish the decay Vs. relay properties of the *in-vivo* timer.

175 Deletion of the TTF which functions as an activator or repressor abolishes the respective relay or  
176 delay interactions. However, it may have additional effects that are not directly related to these  
177 interactions. We therefore used our simulations to examine whether TTFs deletion phenotypes  
178 can predict the consequence of specifically abolishing the respective activator-relay or  
179 repressor-decay. To this end we considered again all consistent circuits. For each consistent  
180 circuit, we examined how Pdm induction time changes when specifically removing either the  
181 activator-relay (Kr-to-Pdm) or the inhibitor-decay (Hb-to-Pdm) interactions. This allowed us to  
182 compare, for each consistent circuit, the change in Pdm induction time when an upstream TTF  
183 (e.g. Kr) was deleted, or when the respective interaction (e.g. Kr-to-Pdm) was specifically  
184 removed (**Figure 3C,D**). As can be seen, the consequences of these two perturbations were  
185 tightly correlated. A similar tight correlation was also observed when comparing the change in  
186 Cas induction time following the deletion of its activator (Pdm) or the removal of the Pdm-to-  
187 Cas activating link only, and when comparing the consequences of deleting the Cas repressor Kr  
188 to the specific removal of the Kr-to-Cas repression link (**Figure 3E,F**). We conclude that following  
189 Pdm and Cas expression timing in the mutant embryos has the power to inform us not only  
190 about the robustness of the *in-vivo* timer, but also about the relative contributions of the relay  
191 and decay reactions to the TTF progression.

192

193

194 **Timing of Pdm and Cas expression is highly sensitive to deletion of TTF repressors, but less**  
195 **sensitive to deletion of TTF activators**

196 As described above, our modeling suggests that activator-relay and repressor-decay timers can  
197 be distinguished based on the TTF deletion phenotypes, but that this would require data on TTF  
198 expression levels and timing at a much higher temporal resolution than had been obtained  
199 previously. To this end, we stained embryos for the TTF of interest, and for the Worniu and  
200 Engrailed markers, which allow us to unambiguously identify NB7-1 (**Figure 4A**). TTF protein  
201 intensity levels were quantified using confocal microscopy (**Figure 4B**). Variability in staining  
202 intensities was controlled by normalizing TTF staining to that of Engrailed, which is constantly  
203 expressed in NB7-1.

204 Our data confirmed the sequential expression of Hb, Kr, Pdm, and Cas within the NB7-1 lineage  
205 (data not shown). It further revealed that Pdm expression was longer than expected: about 180  
206 minutes (**Figure 4C**). This is long enough to generate more than the two previously reported  
207 Pdm+ GMCs (Isshiki et al., 2001). To determine if there were additional Pdm+ GMCs in the  
208 lineage, we used the NB7-1-specific Gal4 driver to drive the expression of membrane-tethered  
209 superfold GFP and co-stained for Pdm and the GMC marker Asense (**Figure 4D**). We found that  
210 Pdm was upregulated when NB7-1 was producing the 4th GMC and downregulated after the NB  
211 generated the 7th GMC (**Figure 4E**), indicating that four GMCs are produced within the Pdm  
212 expression window. Consistent with this finding, we observed a novel Kr<sup>+</sup>Pdm<sup>+</sup> GMC in the  
213 lineage, which was not previously reported (Isshiki et al., 2001). The newly-discovered GMC may  
214 produce an Eve-negative motor neuron, interneuron, or undergo programmed cell death (see  
215 Discussion).

216 The Pdm expression window is therefore significantly longer than the duration inferred from the  
217 previous data used to calibrate our model. This difference in the timing of Pdm expression in  
218 wild-type embryos has no substantial effect on our model. Indeed, apart from minor  
219 quantitative differences, our main qualitative results, including the ability to distinguish  
220 consistent circuits and the differences between the robustness of decay and relay times,  
221 remained the same.

222 We next used the high temporal resolution expression data to determine whether the relay-  
223 timer or decay-timer could best account for Pdm and Cas expression timing in TTF mutant  
224 backgrounds. We found that *Kr* mutants did not alter Pdm expression, whereas *hb* mutants  
225 advanced Pdm by about two cell-cycles (**Figure 5A-C**), showing that Pdm expression is more  
226 sensitive to deletion of the upstream repressor Hb. Similarly, *pdm* mutants did not have as much  
227 effect on Cas expression as did *Kr* mutants, showing that Cas expression is more sensitive to  
228 deletion of the upstream repressor Kr rather than the upstream activator Pdm (**Figure 5D-F**).

229 Our measurements defined the change in Pdm and Cas induction times following the deletion of  
230 their activator or repressor TTFs. Both induction times showed higher sensitive to repressor  
231 deletion than to the deletion of their activator. These measurements allowed us to position the  
232 *in-vivo* circuit on the delay-relay space, (**c.f. Figure 1H**). First, to estimate the robustness of the  
233 *in-vivo* circuit, we considered Pdm induction times, and positioned the *in-vivo* circuit on the Hb-

234 Kr sensitivity space (**Figure 3B**) using the measured changes in Pdm induction time following  
235 deletion of Hb and of Kr. As can be seen, the *in-vivo* circuit was positioned in the narrow region  
236 in which robust circuits are found, strongly supporting the notion that the *in-vivo* circuit is  
237 indeed robust.

238 Second, we used our data of TTF deletion phenotypes to estimate the consequences of  
239 specifically removing the activator-relay or repressor-decay link. To this end, we used the tight  
240 correlations between the respective phenotypes observed in our simulations, as described in  
241 **Figure 3C-F**. Using these values to position the *in-vivo* circuit on the relay-decay space, clearly  
242 identified this circuit as a decay timer as was predicted by the robustness hypothesis. We  
243 therefore conclude that the timing of TTF expression is driven by a repressor-decay mechanism,  
244 rather than an activator-accumulation mechanism (**Figure 5G-I**).

245

## 246 Discussion

247 Our study suggests that a repressor-decay timer drives the sequential TTF expression to  
248 generate stereotyped temporal fate specification in *Drosophila* embryonic NB lineages (**Figure**  
249 **5J**). This finding may appear surprising, as previously this timer was thought to progress through  
250 a relay of activators achieved by feed-forward activation combined with feedback repression. A  
251 similar activator-relay mechanism was implicated also in driving the TTF cascade in *Drosophila*  
252 optic lobe NB lineages (Bertet et al., 2014; Li et al., 2013). Still, experimentally established cross-  
253 regulation between the TTFs are consistent with both activator-relay and repressor-decay  
254 mechanisms, and the parameters defining the relative contributions of repressor decay or  
255 activator accumulation to the expression timing of each TTF were unknown.

256 We predicted that repressor-decay dominates TTF progression based on our computational  
257 results showing that this timer better buffers variation ('noise') in molecular parameters. Robust  
258 TTF progression is needed to maintain synchrony with the NB division cycles, a prerequisite for a  
259 reproducible NB lineage. At first sight, repressor degradation and activator accumulation may  
260 appear equivalent for measuring time delays. However, closer examination shows that they are  
261 in fact very different. First, activator accumulation requires continuous transcription while  
262 repressor degradation occurs following transcription shutdown. Second, activator accumulation  
263 approaches some steady state, which limits the possible readout thresholds. Furthermore, most  
264 of the dynamics is spent close to this threshold, so that small changes in threshold levels are  
265 translated into large changes in the measured delay time. By contrast, there is no such  
266 (theoretical) restriction on the readout threshold as repressor decays to zero expression.  
267 Together, these properties lead to different buffering capacities, both when considering a  
268 single-step timer, or in the context of the full TTF timer model. In all cases, encoding time-delays  
269 by repressor decay greatly promotes robustness.

270 Experimentally, we tested whether TTF progression is dominated by the repressor-decay  
271 interactions by measuring the expression timing of the last two TTFs in the cascade, Pdm and  
272 Cas. In both cases, TTF induction time was defined by the reduction in upstream repressor level,  
273 but showed little, if any change when upstream activator was deleted. Kr was not included in

274 this analysis since we found that Kr was maintained in Hb mutant embryos (data not shown,  
275 (Isshiki et al., 2001)), indicating that Kr is induced by a factor external to the cascade, similarly to  
276 Hb. Notably, Kr remained constitutively expressed in embryos which were forced to express  
277 constitutive levels of Hb. Therefore, while Hb is an activator of Kr, it affects Kr expression not by  
278 determining its induction time but rather by determining shut-off time, allowing Kr decay only  
279 when Hb decays below a threshold, again implementing a repressor-decay, rather than an  
280 activator-relay timer. Hb is rapidly degraded during early embryogenesis, with an estimated  
281 half-life of ~15 min (Okabe-Oho et al., 2009). While this half-life was not measured directly in  
282 NBs, it is likely to be similarly short based on the 1:1 relationship between *hb* transcriptional  
283 activity (detected with an intron probe) and Hb protein levels (detected with an antibody)  
284 (Grosskortenhau et al., 2005). Assuming that Hb mRNA is similarly fast degrading, and that Hb  
285 is transcribed for only one cell-cycle, we estimate that Pdm starts expressing when Hb levels  
286 reduce to about 1-10% of their maximal value.

287 Our quantification of Pdm expression in wild-type embryos revealed that this phase is longer  
288 than previously thought, and led to the identification of a previously unrecognized Kr+Pdm+  
289 GMC generated during this phase. Six motor neurons have previously been reported for the  
290 NB7-1 lineage (Landgraf et al., 1997; Schmid et al., 1999), yet there are only five Eve+ motor  
291 neurons in the lineage, raising the possibility that this “new” GMC may produce an Eve-negative  
292 motor neuron. Our analysis also revealed that Pdm is expressed in a burst during the Hb  
293 window. This was noted by Isshiki et al. (2001) but neither the functional significance nor the  
294 mechanism was discussed. Regarding function, we suggest that this early window of Pdm  
295 expression may allow it to be inherited in the first-born GMC, where in at least one lineage  
296 (NB4-2) it is required to specify first-born GMC identity, together with Hb (Bhat et al., 1995; Bhat  
297 and Schedl, 1994; McDonald et al., 2003; Yang et al., 1993; Yeo et al., 1995). Regarding  
298 mechanism, early Pdm and Cas expression is likely to be due to independent transcriptional  
299 activation of both genes, followed by repression of *pdm* transcription by Hb protein (Kambadur  
300 et al., 1998). The Pdm protein produced from the initial transcriptional burst, prior to Hb-  
301 mediated transcriptional repression, may persist into the new-born GMC. Alternatively, there  
302 may be a mechanism for blocking Hb repression of *pdm* transcription specifically in early-  
303 forming NBs.

304 In conclusion, we propose that the need to maintain robust gene expression timing within a  
305 noisy biological environment favored evolution of repressor-decay regulatory circuits controlling  
306 developmental patterning. This was previously shown for circuits that coordinate spatial  
307 patterning through the establishment of morphogen gradients or the control of direct cell-to-  
308 cell communication (Barkai and Shilo, 2009; Eldar et al., 2002; Eldar et al., 2003; Gavish et al.,  
309 2016; Rahimi et al., 2016). Our study suggests that robustness also played a major role in the  
310 design of developmental timers that function in neuronal differentiation.

311

312

313



## 314 **Materials and Methods**

### 315 Computational Methods

316 Randomized parameter sets (circuits) were generated by randomly selecting values for model  
317 parameters (See SI) from ranges indicated in **Table S3**. Parameters were then substituted into  
318 model equations (See SI) and solved numerically by a standard MATLAB ODE solver. The  
319 solutions were tested for consistency: a consistent solution is one in which the temporal  
320 sequence of “on” (above threshold) TTFs is according to experimental observations for both WT  
321 and all mutants (**Figure 1C,D**). Consistent parameter sets were scored for robustness to TTF  
322 production rates. When testing set robustness, we solved all combinatorial combinations of  
323 adding or subtracting 20% to all the TTFs production rates and then compared phase durations  
324 of each such noise combination set to those of the original set solution. Only if a noise  
325 combination yielded phase durations which are all within 10% distance of the respective original  
326 durations, the noise combination was considered “close” to the original. A robustness score was  
327 then calculated as the percentage of “close” noise combinations. The phases considered for this  
328 purpose were expression/co-expression phases leading to **different** neuronal fates (**Table S1**).  
329 For example, a phase of Hb only expression followed by co-expression of Hb and Kr was  
330 considered a single phase since both lead to the 1 and 2 neuronal fates rendering the timing of  
331 Kr induction irrelevant in terms of NB lineage. In order to create perturbed parameter sets,  
332 parameter values or terms in model equations were changed accordingly: for TTF deletion the  
333 respective production rates were set to 0. For constitutive expression of a TTF, all the terms in  
334 model equations regulating this TTFs production were set to 1. For specific regulation removal,  
335 the regulation term was set to 1 (See SI for model equations). For **Figure 1H** and **Figure 2E**,  
336 significance scores of decay and relay for each consistent parameter set were first calculated  
337 with respect to Pdm and Cas separately. These scores were based on change in Pdm or Cas  
338 induction times caused by removing the decay or relay regulations governing these inductions.  
339 The difference in induction time for a perturbed set was calculated as

340 
$$\Delta t^{ind} = \frac{100 * |t_{Perturbed}^{ind} - t_{Wild Type}^{ind}|}{t_{Wild Type}^{ind}}$$
 for each parameter set and then normalized as percentage out

341 of the maximal  $\Delta t^{ind}$  observed for all parameter sets, for this specific perturbation. The decay  
342 significance score, taking into account both Pdm and Cas induction regulation, was calculated by  
343 summing  $\Delta t^{ind}$  for Pdm (perturbation: removal of Hb--|Pdm) and  $\Delta t^{ind}$  for Cas (perturbation:  
344 removal of Kr--|Cas) and normalizing as percentage out of the maximal sum observed for all  
345 sets. The relay significance score was calculated similarly, only with relay removal perturbations.  
346 For **Figure 5G** and **Figure S1**, the calculation of *in-vivo* system location according to its  $\Delta t^{ind}$  for  
347 TTF deletion perturbations was performed by assuming the experimentally observed  $t_{Wild Type}^{ind}$   
348 and  $t_{Perturbed}^{ind}$  were the middle of the stage in which induction occurred, with an overall error  
349 margin of half that stage duration. These error margins were further increased when translating  
350 from  $\Delta t^{ind}$  for TTF deletions to  $\Delta t^{ind}$  for appropriate regulation removal. This translation was  
351 performed by placing the measured  $\Delta t^{ind}$  for TTF deletion on the correlation plots in **Figure 5H**  
352 and defining the range for regulation removal  $\Delta t^{ind}$  as the maximal range on the Y axis reached  
353 by robust (robustness score>80) sets within the X axis range of measured  $\Delta t^{ind}$  and its error  
354 margins. For **Figure 5I**, the joint Pdm and Cas decay and relay significance scores were again  
355 calculated by adding the scores for both TTFs and normalizing as previously described for  
356 simulated parameter sets. Normalization of measured  $\Delta t^{ind}$  for Pdm decay and relay removal  
357 was done by dividing by greatest experimentally observable values: Pdm induction at t=0 which  
358 corresponds to  $\Delta t^{ind} = 100\%$  in the decay case and the middle of the last stage in the

359 experiment (S12) in the relay case. For Cas, there was no need to normalize  $\Delta t^{ind}$  for relay  
360 removal since Cas induction in this case occurred during the last stage (S12) in the experiment.  
361 Cas decay removal  $\Delta t^{ind}$  was normalized by greatest  $\Delta t^{ind}$  observed in simulated parameter  
362 sets since we cannot expect Cas upregulation at t=0 because of inhibition by Hb.

363

## 364 Experimental Methods

365

366 The following flies were used: (1)  $y^1w^1$  (FBst0001495); (2)  $hb^{FB}, hb^{P1}/TM3 ftz-lacZ$  (Isshiki et al.,  
367 2001); (3)  $Kr^{CD}, Kr^1/CyO wg-lacZ$  (Isshiki et al., 2001); (4)  $Df(2L)ED773/CyO wg-lacZ$   
368 (Grosskortenhaus et al., 2006); (5)  $ac-VP16^{AD}, gsb-Gal4^{DBD}$  (Kohwi and Doe, 2013); (6)  $w^{1118};$   
369  $10xUAS-IVS-myr::sfGFP-THS-10xUAS(FRT.stop)myr::smGdP-HA(attP2)$ (FBst0062127). Embryos  
370 were collected and incubated at 25°C until designated stages, and then fixed and stained with  
371 antibodies by following published protocols (Grosskortenhaus et al., 2005; Kohwi and Doe,  
372 2013; Tran and Doe, 2008). The primary antibodies used in the studies were: rabbit anti-Ase  
373 (Cheng-Yu Lee, University of Michigan), mouse-anti-beta-galactosidase (Promega), rabbit anti-  
374 Cas (Mellerick et al., 1992) (Doe lab), rat anti-Dpn (Abcam, Eugene, OR), mouse anti-En 4D9  
375 (Developmental Studies Hybridoma Bank (DHSB), Iowa City, IA), mouse anti-Hb (Abcam, Eugene,  
376 OR), guinea pig anti-Kr (Doe lab), rat anti-Pdm2 (Abcam, Eugene, OR), and rabbit anti-Wor (Doe  
377 lab). Fluorophore-conjugated secondary antibodies were from Jackson ImmunoResearch.  
378 Confocal images were taken by Zeiss LSM710 and protein quantities were measured with open  
379 software FIJI (Schindelin et al., 2012). Data was processed and plotted by Matlab. Mean volume  
380 and Standard deviation (STD) for all wild type NB7-1s were calculated. All NBs whose volume  
381 was further than 2 STD from mean volume (above or below) weren't included in analysis,  
382 assuming these are currently dividing or miss identified cells. In order to determine the stage of  
383 Pdm and Cas induction from box plots in **Figure 5A-F**, a “background” level for both TTFs was  
384 defined as the mean of their mean levels (red line in box plots) in the second and third stages  
385 (S10E and S10), in WT. The first stage (S9) was not considered for this purpose due to possible  
386 early transient induction. The stage of induction was then defined as the first stage for which  
387 the 1.96 SEM (95% confidence interval- red rectangle) was above this mean, and was followed  
388 by an additional stage that satisfied this condition. The latter condition was disregarded for  
389 induction at the last stage of the experiment, stage S12.

390

## 391 Acknowledgements

392 We thank Benny Shilo, Eyal Schejter, Danny Ben-Zvi and Gat Krieger for comments on the  
393 manuscript; Cheng-Yu Lee, Ward Odenwald and DHSB for antibodies. S.-L.L. and C.Q.D. were  
394 funded by the Howard Hughes Medical Institute and NIH R01-HD27056. N.B. was supported by a  
395 grant from the ERC.

396

## 397 Author contributions

398 I.A. did the modeling and conceived the project; S.-L.L. did the animal experiments; N.B. and  
399 C.Q.D. helped design experiments. All authors contributed to writing the manuscript.

400 **Figure 1: The TTF regulatory circuit combines activator-relay and repressor-decay timers**

401

402 (A) The embryonic neuroblast TTF timer: In the *Drosophila* embryo, NBs express four TFs in a  
403 temporal sequence, as shown. We term this sequence the TTF timer. NBs divide asymmetrically  
404 to generate GMCs, whose further divisions produce post-mitotic neurons. The identity of both  
405 the GMCs and the post-mitotic neurons depends on the TTF expressed at the time of NB  
406 division, as shown in panel C, top left.

407 (B) The TTF regulatory circuit: Experimentally defined cross-regulation between TTFs include  
408 interactions that propagate the cascade through activator relay (blue) or repressors decay (red),  
409 and backward interactions (black).

410 (C) Summary of TTF expression in NB7-1 of wild type, mutant, and misexpression genotypes.  
411 TTFs are color-coded as in (A). Developmental stages indicated at the bottom and genotypes on  
412 the left. Data from (Grosskortenhaus et al., 2006; Isshiki et al., 2001; Tran et al., 2010).

413 (D) Summary of neuronal identity in the NB7-1 lineage of wild type, mutant, and misexpression  
414 genotypes. Data from (Grosskortenhaus et al., 2006; Isshiki et al., 2001).

415 (E) TTF timer model reproduces all reported phenotypes: A model was formulated that includes  
416 all regulatory interactions shown in Fig. 1B. Shown are the simulated dynamics of TTFs  
417 expression for a set of experimentally consistent parameters. Progeny identity was defined by  
418 the TTFs whose expression exceeded a constant threshold (dashed line) at the time of division  
419 (See **Table S1** for mapping of expressed TTFs to neuronal fate).

420 (F) Mutant (top) and constitutive expression (bottom) models using the same parameter set as  
421 in 1E (see Methods for details).

422 (G-H) Consistent circuits are distributed through the relay-decay timer space: over  $10^6$  circuits  
423 differing by parameters choice were considered. A subset of  $\sim 10^5$  circuits reproduced all  
424 experimentally defined phenotypes and are referred to as consistent circuits, or consistent  
425 parameter sets. Each consistent circuit was positioned on the relay-decay plot (H) based on the  
426 changes in Pdm and Cas induction (ind) times following removal of the respective activator-relay  
427 or repressor-decay interactions (grey bars, top of G). The density of consistent circuits in the  
428 relay-decay plot is color-coded. Note the larger density of consistent circuits in the regime of  
429 decay-timers. See Methods for details.

430

431

432

433

434

435

436

437

438 **Figure 2: Repressor-decay timer is more robust than an activator-relay timer**

439

440 (A-C) Robustness of single-step timers: a single-step timer can be implemented by the  
441 accumulation of an activator (A) or by the decay of a repressor (B). In the accumulation of an  
442 activator scenario (A), activator production is initiated at  $t = 0$ . Once it accedes the threshold  $T_r$ ,  
443 target genes are induced. In the decay of a repressor scenario (B), production of a repressor is  
444 stopped at  $t = 0$ . Once repressor levels have decayed below  $T_r$ , target genes would no longer be  
445 inhibited. The temporal dynamics of the regulatory proteins are shown in (A-B) for reference  
446 parameters (solid line) and following two-fold reduction in regulator production rate (dashed  
447 line). Timer output is defined by the time-delay from the onset of the dynamics until the  
448 regulator reaches the indicated threshold  $T_r$ . The change in this output following two-fold  
449 change in production rate is indicated (black double arrow), and is shown in (C) for different  
450 threshold values. See also analytical analysis in (Rappaport et al., 2005).

451

452 (D-E) Distribution of robust circuits in the relay-decay timer space: consistent circuits, described  
453 in Fig. 1, were scored for robustness by measuring timer sensitivity to moderate (20%) variations  
454 in production parameters (see Methods). Examples for circuits showing different robustness  
455 scores are shown (D). Circuits were positioned on the relay-decay plot, as is Fig. 1H, and their  
456 robustness scores, averaged over closely-positioned circuits, are color-coded (E).

457

458 **Figure 3: The TTF circuit can be positioned in the relay-decay timer space based on TTF**  
459 **deletion phenotypes**

460

461 (A-B) TTFs deletion phenotypes can distinguish robust circuits: All consistent circuits, as  
462 described in Figure 1-2 above, were considered. Each consistent circuit was scored by measuring  
463 the change in Pdm induction times following deletion of Hb (A, left) or deletion of Kr (A, right).  
464 These values were used to uniquely position each circuit in the Kr-Hb sensitivity space (B).  
465 Color-coding circuits based on their robustness score, as in Figure 2E, shows that robust circuits  
466 are only found in a small region in the Kr-Hb sensitivity space, in which Pdm induction time is  
467 insensitive to Kr deletion.

468

469 (C-F) Sensitivity to TTF deletion (X axis) correlates with the sensitivity to the specific removal of  
470 the respective activator-relay or inhibition delay interactions (Y axis): All consistent circuits, as  
471 described in Figure 1-2 above, were considered. For each consistent circuit, the changes in Pdm  
472 or Cas induction times following TTF deletion or removal of regulatory interactions was  
473 measured. Correlations between the effects of TTF deletion and removal of the respective  
474 regulatory link are shown. Each dot in these correlation figures represent one consistent circuit,  
475 color-coded by its robustness score.

476

477

478

479

480 **Figure 4: High temporal resolution analysis of Pdm expression.**

481

482 (A) Confocal image of the neuroblast layer from ventral nerve cord segments T2 and T3 of an early  
483 stage 11 embryo (boxed area in illustrated embryo on the left). The NB7-1 was identified by the  
484 pan-NB marker Worniu (Wor) and the NB spatial marker Engrailed (En). NB6-1 is the most anterior  
485 medial En+ NB, with the En+ NB7-1 just posterior and lateral (red arrow), and En+ NB1-2  
486 completing the diagonal. Genotype:  $y^1 w^1$ . Scale bar: 20  $\mu\text{m}$ .

487

488 (B) Methodology for obtaining transcription factor levels in G1/G2/S-phase of NB7-1. Confocal  
489 section stacks (at a 1  $\mu\text{m}$  interval) of individual NB nuclei were obtained, and the area and signal  
490 intensity of each section were measured and summed to obtain the total intensity of TTFs.

491

492 (C) Data from the number of NB7-1 indicated in Table S2 is summarized by box plots of  
493 measured  $\log(\text{Pdm}/\text{En})$  staining intensity as a function of time. The 1.96 SEM (95% confidence  
494 interval) is shown as a red rectangle with a horizontal red line for the mean, with a blue  
495 rectangle marking the limits of one standard deviation above and below the mean. Time  
496 duration of the Pdm phase (approximately 180 minutes) is indicated by a red double arrow.

497

498 (D) Confocal image of a NB7-1 lineage marked with GFP (*NB7-1-Gal4, UAS-GFP*) in an early stage  
499 11 embryo. Arrowheads indicate three consecutive GMCs (*Ase*<sup>+</sup>) which are *Kr*<sup>+</sup>*Pdm*<sup>-</sup> (green),  
500 *Kr*<sup>+</sup>*Pdm*<sup>+</sup> (pink), and *Kr*<sup>-</sup>*Pdm*<sup>+</sup> (orange). Genotype: *ac-VP16<sup>AD</sup> gsb-Gal4<sup>DBD</sup> UAS-superfoldGFP*. Scale  
501 bar: 5  $\mu\text{m}$ .

502

503 (E) Data from the number of NB7-1 indicated in Table S2 is summarized by box plots of  
504 measured  $\log(\text{Pdm}/\text{En})$  staining intensity as a function of the number of progeny GMC. The 1.96  
505 SEM (95% confidence interval) is shown in red rectangle with a horizontal red line for the mean,  
506 one standard deviation above and below the mean in blue rectangle. Scheme below the X axis  
507 shows which neuronal progeny is hypothesized to be derived from the newest GMC.

508

509

510

511

512

513

514

515

516

517

518

519

520 **Figure 5: Positioning the in-vivo TTF circuit in the relay-decay timer space**

521

522 (A-C) Pdm expression in NB7-1. Pdm expression was quantified in wild-type and mutant  
523 embryos. Data from the number of NB7-1 indicated in Table S2 is summarized by a box-plot,  
524 with 95% confidence interval shown in red and the 1 SD in blue. Developmental stages are  
525 indicated on the X axis. Stages of Pdm induction indicated by black arrows. Early transient  
526 inductions are indicated by grey arrows (see Methods for details).

527

528 (D-F) Cas expression in NB7-1 wild type and mutant embryos. Data was plotted as described in  
529 (A-C).

530

531 (G) Position of the *in-vivo* timer in the Pdm Hb-Kr sensitivity space: The measured changes in  
532 Pdm induction time following Kr and Hb deletions were used to position the *in-vivo* circuit in the  
533 Hb-Kr sensitivity space (black diamond), as described for the simulated data **Figure 3B**. Error  
534 bars are based on the experimental temporal resolution (see Methods for details).

535

536 (H) Estimating the sensitivity of the *in-vivo* timer to removal of delay or relay interactions: The  
537 measured changes in Pdm and Cas induction times following TTF deletions were used to position  
538 the *in-vivo* circuit on the correlation plots from **Figure 3C-F** by taking the measured range  
539 denoted by 1,2 for  $\Delta$ Hb and 3,4 for  $\Delta$ Kr in **Figure 5G** and measuring the corresponding ranges for  
540 regulation removal. These are denoted by 1',2' and 3', 4' respectively in **Figure 5H** upper plots.  
541 Similarly, this was done for Cas regulation in **Figure 5H** lower plots (based on measured ranges  
542 in **Figure S1**, see Methods for details).

543 (I) The TTF circuit is positioned in the region of repressor-delay timers: Data from A-H above  
544 defined the positioning of the TTF circuit on the decay-relay timer space (see text and Methods).  
545 Location of the in-vivo circuit is indicated by a black diamond, with error margins indicated by  
546 dashed error bars.

547

548 (J) Our analysis indicates that the progress of TTF expression is dominated by repressor-decay,  
549 and not activator-accumulation. The NB TTF timer is shown again, with dominant decay  
550 regulations in bold.

551 **References**

- 552 Barkai, N., Shilo, B.Z., 2009. Robust generation and decoding of morphogen gradients. *Cold*  
553 *Spring Harb Perspect Biol* 1, a001990.
- 554 Baumgardt, M., Karlsson, D., Terriente, J., Diaz-Benjumea, F.J., Thor, S., 2009. Neuronal subtype  
555 specification within a lineage by opposing temporal feed-forward loops. *Cell* 139, 969-982.
- 556 Bertet, C., Li, X., Erclik, T., Cavey, M., Wells, B., Desplan, C., 2014. Temporal patterning of  
557 neuroblasts controls Notch-mediated cell survival through regulation of Hid or Reaper. *Cell* 158,  
558 1173-1186.
- 559 Bhat, K.M., Poole, S.J., Schedl, P., 1995. The miti-mere and pdm1 genes collaborate during  
560 specification of the RP2/sib lineage in *Drosophila* neurogenesis. *Mol Cell Biol* 15, 4052-4063.
- 561 Bhat, K.M., Schedl, P., 1994. The *Drosophila* miti-mere gene, a member of the POU family, is  
562 required for the specification of the RP2/sibling lineage during neurogenesis. *Development* 120,  
563 1483-1501.
- 564 Brody, T., Odenwald, W.F., 2000. Programmed transformations in neuroblast gene expression  
565 during *Drosophila* CNS lineage development. *Dev. Biol.* 226, 34-44.
- 566 Brody, T., Odenwald, W.F., 2002. Cellular diversity in the developing nervous system: a temporal  
567 view from *Drosophila*. *Development* 129, 3763-3770.
- 568 Cleary, M.D., Doe, C.Q., 2006. Regulation of neuroblast competence: multiple temporal identity  
569 factors specify distinct neuronal fates within a single early competence window. *Genes Dev.* 20,  
570 429-434.
- 571 Doe, C.Q., 2017. Temporal Patterning in the *Drosophila* CNS. *Annu. Rev. Cell Dev. Biol.* 33, 219-  
572 240.
- 573 Eldar, A., Dorfman, R., Weiss, D., Ashe, H., Shilo, B.Z., Barkai, N., 2002. Robustness of the BMP  
574 morphogen gradient in *Drosophila* embryonic patterning. *Nature* 419, 304-308.
- 575 Eldar, A., Rosin, D., Shilo, B.Z., Barkai, N., 2003. Self-enhanced ligand degradation underlies  
576 robustness of morphogen gradients. *Dev Cell* 5, 635-646.
- 577 Gavish, A., Shwartz, A., Weizman, A., Schejter, E., Shilo, B.Z., Barkai, N., 2016. Periodic patterning  
578 of the *Drosophila* eye is stabilized by the diffusible activator Scabrous. *Nat Commun* 7, 10461.
- 579 Grosskortenhaus, R., Pearson, B.J., Marusich, A., Doe, C.Q., 2005. Regulation of temporal  
580 identity transitions in *Drosophila* neuroblasts. *Dev Cell* 8, 193-202.
- 581 Grosskortenhaus, R., Robinson, K.J., Doe, C.Q., 2006. Pdm and Castor specify late-born motor  
582 neuron identity in the NB7-1 lineage. *Genes Dev* 20, 2618-2627.
- 583 Isshiki, T., Pearson, B., Holbrook, S., Doe, C.Q., 2001. *Drosophila* neuroblasts sequentially  
584 express transcription factors which specify the temporal identity of their neuronal progeny. *Cell*  
585 106, 511-521.
- 586 Kambadur, R., Koizumi, K., Stivers, C., Nagle, J., Poole, S.J., Odenwald, W.F., 1998. Regulation of  
587 POU genes by castor and hunchback establishes layered compartments in the *Drosophila* CNS.  
588 *Genes Dev* 12, 246-260.
- 589 Kanai, M.I., Okabe, M., Hiromi, Y., 2005. seven-up Controls switching of transcription factors  
590 that specify temporal identities of *Drosophila* neuroblasts. *Dev Cell* 8, 203-213.
- 591 Kohwi, M., Doe, C.Q., 2013. Temporal fate specification and neural progenitor competence  
592 during development. *Nat. Rev. Neurosci.* 14, 823-838.
- 593 Kohwi, M., Hiebert, L.S., Doe, C.Q., 2011. The pipsqueak-domain proteins Distal antenna and  
594 Distal antenna-related restrict Hunchback neuroblast expression and early-born neuronal  
595 identity. *Development* 138, 1727-1735.
- 596 Landgraf, M., Bossing, T., Technau, G.M., Bate, M., 1997. The origin, location, and projections of  
597 the embryonic abdominal motorneurons of *Drosophila*. *J Neurosci* 17, 9642-9655.

- 598 Li, X., Erclik, T., Bertet, C., Chen, Z., Voutev, R., Venkatesh, S., Morante, J., Celik, A., Desplan, C.,  
599 2013. Temporal patterning of *Drosophila* medulla neuroblasts controls neural fates. *Nature* 498,  
600 456-462.
- 601 McDonald, J.A., Fujioka, M., Odden, J.P., Jaynes, J.B., Doe, C.Q., 2003. Specification of  
602 motoneuron fate in *Drosophila*: integration of positive and negative transcription factor inputs  
603 by a minimal *eve* enhancer. *J Neurobiol* 57, 193-203.
- 604 Mellerick, D.M., Kassis, J.A., Zhang, S.D., Odenwald, W.F., 1992. *castor* encodes a novel zinc  
605 finger protein required for the development of a subset of CNS neurons in *Drosophila*. *Neuron* 9,  
606 789-803.
- 607 Mettler, U., Vogler, G., Urban, J., 2006. Timing of identity: spatiotemporal regulation of  
608 hunchback in neuroblast lineages of *Drosophila* by *Seven-up* and *Prospero*. *Development* 133,  
609 429-437.
- 610 Murray, A.W., 2004. Recycling the cell cycle: cyclins revisited. *Cell* 116, 221-234.
- 611 Okabe-Oho, Y., Murakami, H., Oho, S., Sasai, M., 2009. Stable, precise, and reproducible  
612 patterning of *bicoid* and *hunchback* molecules in the early *Drosophila* embryo. *PLoS Comput Biol*  
613 5, e1000486.
- 614 Pearson, B.J., Doe, C.Q., 2004. Specification of temporal identity in the developing nervous  
615 system. *Annu. Rev. Cell Dev. Biol.* 20, 619-647.
- 616 Pourquie, O., 1998. Clocks regulating developmental processes. *Curr Opin Neurobiol* 8, 665-670.
- 617 Rahimi, N., Averbukh, I., Haskel-Ittah, M., Degani, N., Schejter, E.D., Barkai, N., Shilo, B.Z., 2016.  
618 A WntD-Dependent Integral Feedback Loop Attenuates Variability in *Drosophila* Toll Signaling.  
619 *Dev Cell* 36, 401-414.
- 620 Rappaport, N., Winter, S., Barkai, N., 2005. The ups and downs of biological timers. *Theor Biol*  
621 *Med Model* 2, 22.
- 622 Reppert, S.M., Weaver, D.R., 2002. Coordination of circadian timing in mammals. *Nature* 418,  
623 935-941.
- 624 Rossi, A.M., Fernandes, V.M., Desplan, C., 2017. Timing temporal transitions during brain  
625 development. *Curr Opin Neurobiol* 42, 84-92.
- 626 Schindelin, J., Arganda-Carreras, I., Frise, E., Kaynig, V., Longair, M., Pietzsch, T., Preibisch, S.,  
627 Rueden, C., Saalfeld, S., Schmid, B., Tinevez, J.Y., White, D.J., Hartenstein, V., Eliceiri, K.,  
628 Tomancak, P., Cardona, A., 2012. Fiji: an open-source platform for biological-image analysis. *Nat*  
629 *Methods* 9, 676-682.
- 630 Schmid, A., Chiba, A., Doe, C.Q., 1999. Clonal analysis of *Drosophila* embryonic neuroblasts:  
631 neural cell types, axon projections and muscle targets. *Development* 126, 4653-4689.
- 632 Simon, I., Barnett, J., Hannett, N., Harbison, C.T., Rinaldi, N.J., Volkert, T.L., Wyrick, J.J.,  
633 Zeitlinger, J., Gifford, D.K., Jaakkola, T.S., Young, R.A., 2001. Serial regulation of transcriptional  
634 regulators in the yeast cell cycle. *Cell* 106, 697-708.
- 635 Tran, K.D., Doe, C.Q., 2008. *Pdm* and *Castor* close successive temporal identity windows in the  
636 NB3-1 lineage. *Development* 135, 3491-3499.
- 637 Tran, K.D., Miller, M.R., Doe, C.Q., 2010. Recombineering *Hunchback* identifies two conserved  
638 domains required to maintain neuroblast competence and specify early-born neuronal identity.  
639 *Development* 137, 1421-1430.
- 640 Yang, X., Yeo, S., Dick, T., Chia, W., 1993. The role of a *Drosophila* POU homeo domain gene in  
641 the specification of neural precursor cell identity in the developing embryonic central nervous  
642 system. *Genes Dev* 7, 504-516.
- 643 Yeo, S.L., Lloyd, A., Kozak, K., Dinh, A., Dick, T., Yang, X., Sakonju, S., Chia, W., 1995. On the  
644 functional overlap between two *Drosophila* POU homeo domain genes and the cell fate  
645 specification of a CNS neural precursor. *Genes Dev* 9, 1223-1236.



Figure 1

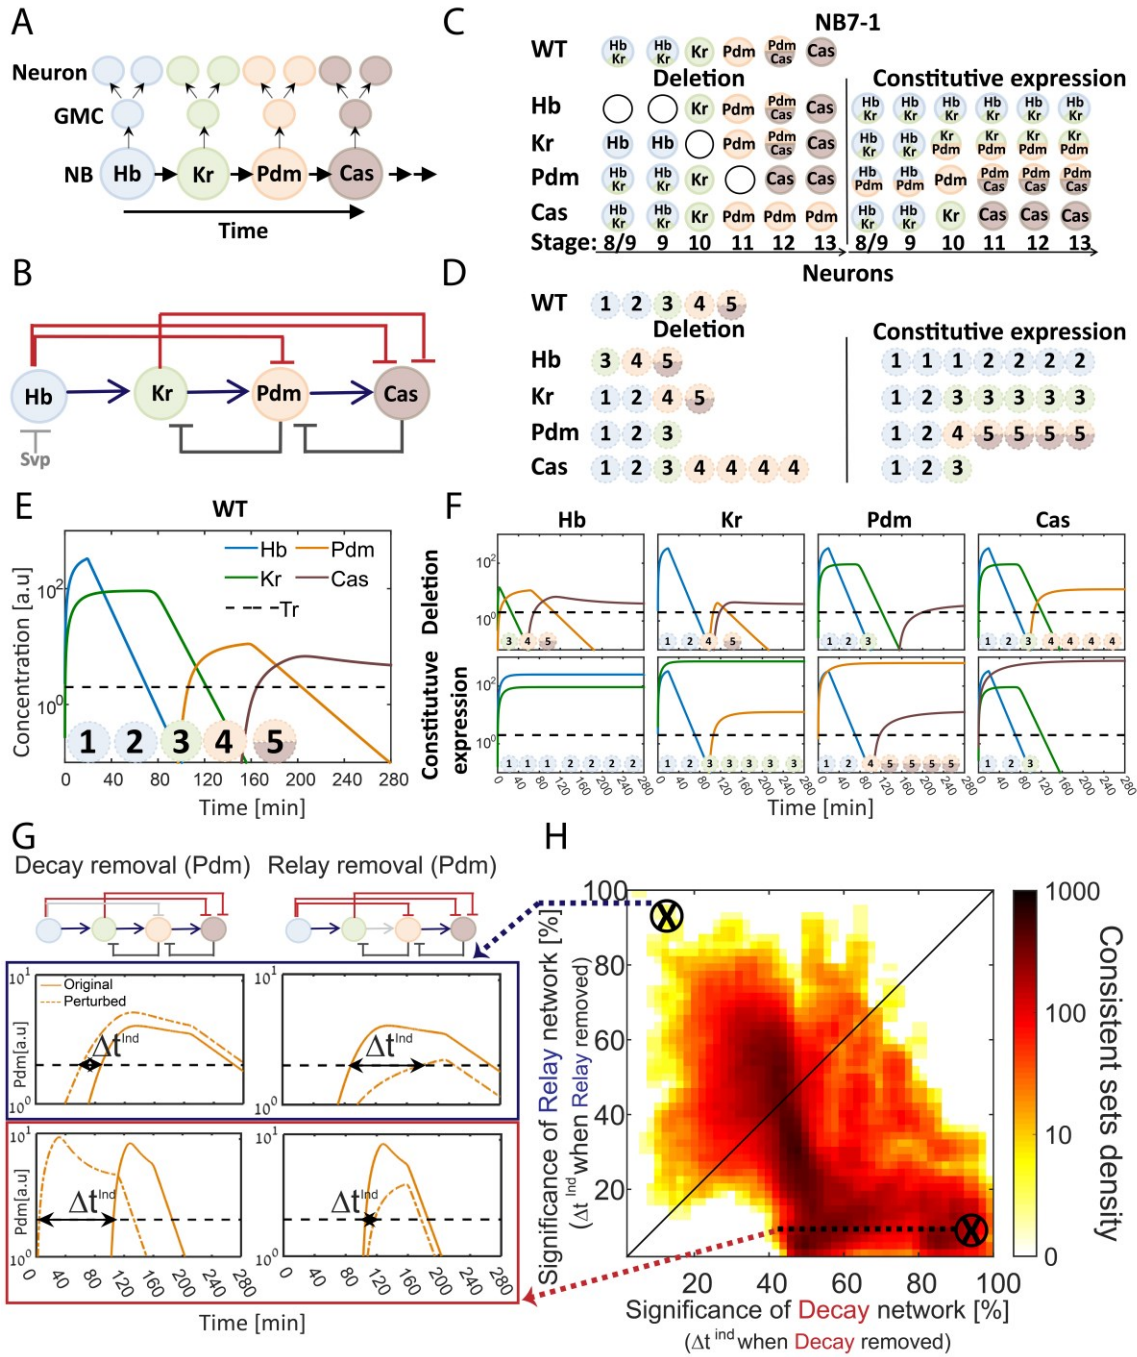

Figure 2

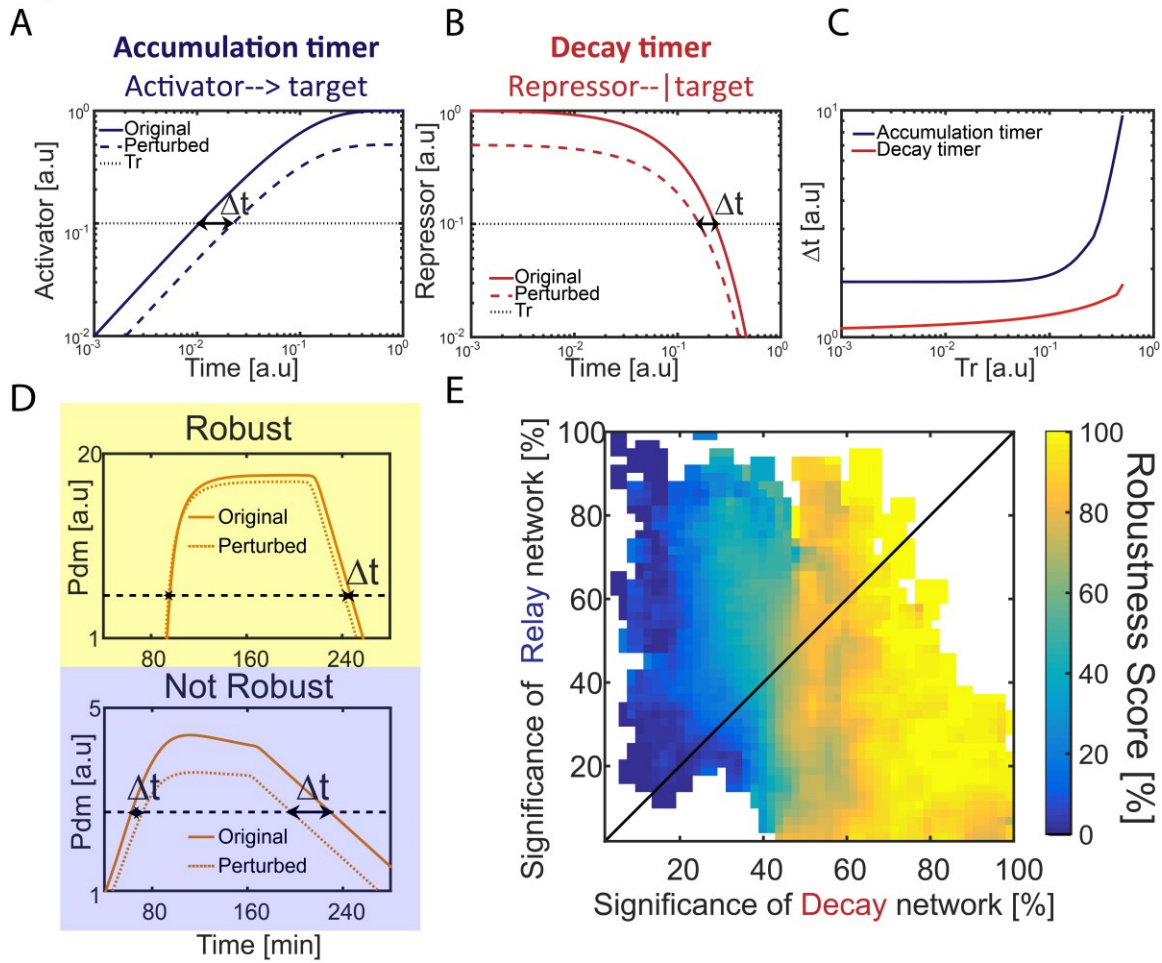

Figure 3

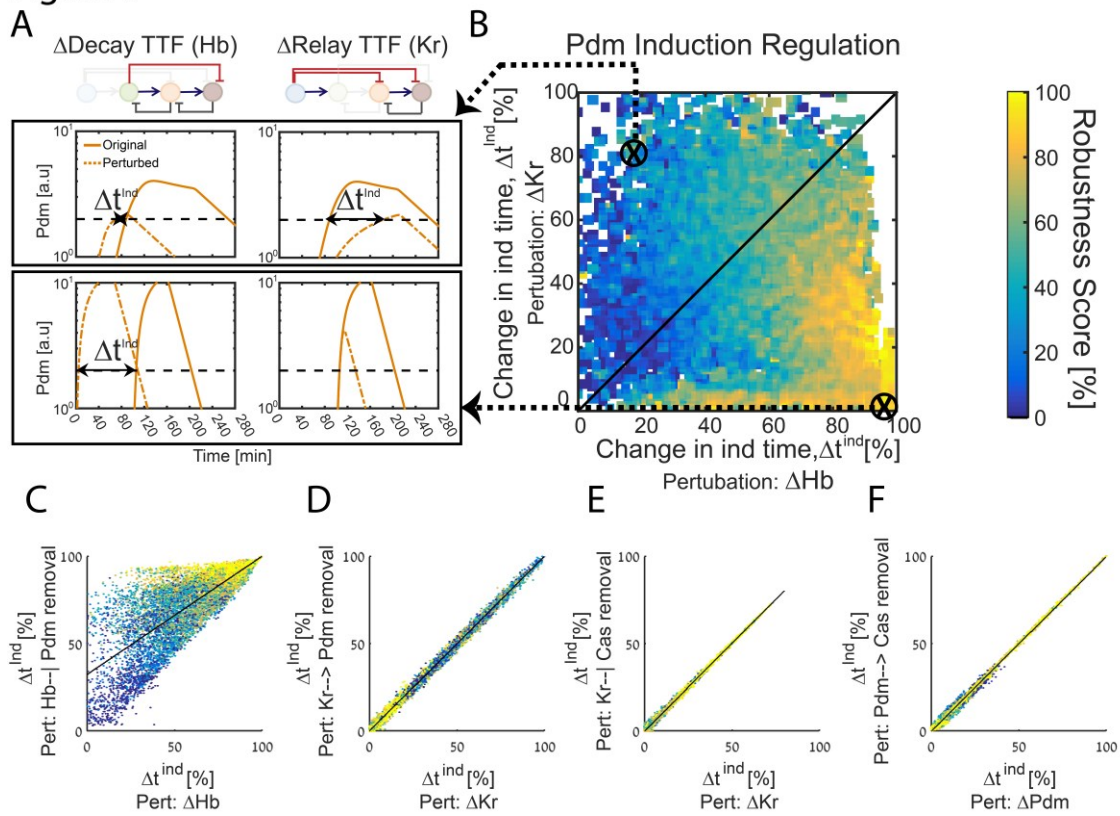

Figure 4

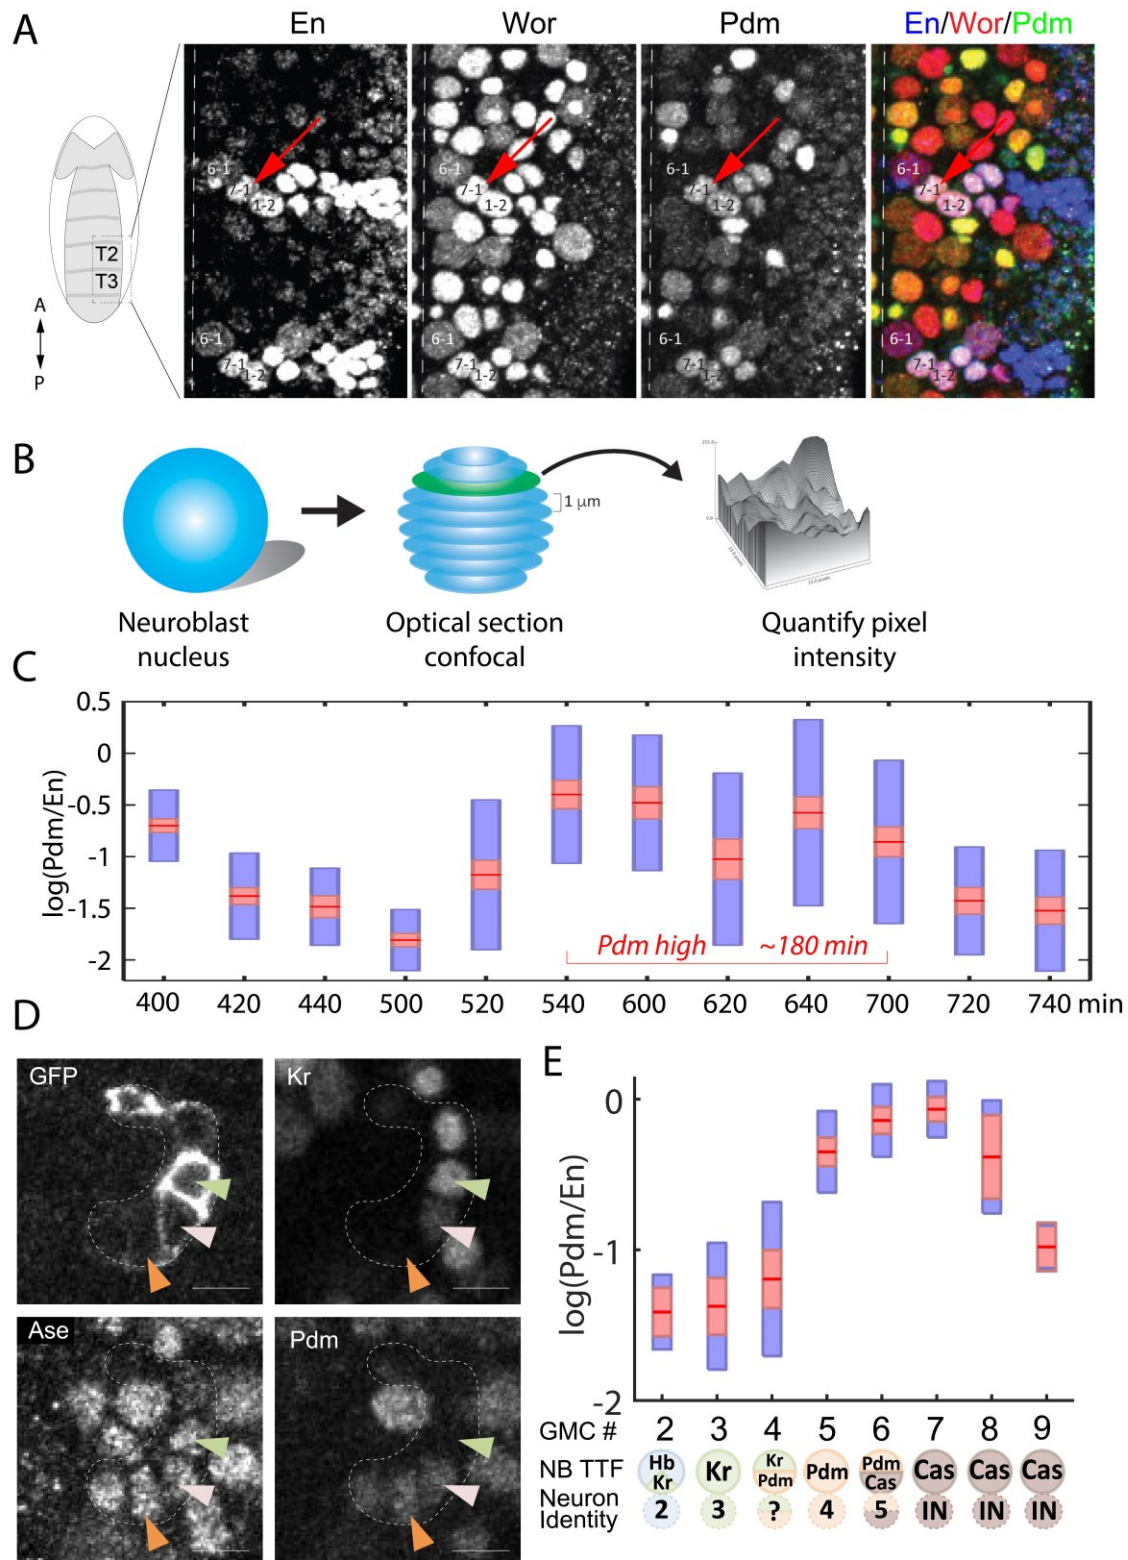

Figure 5

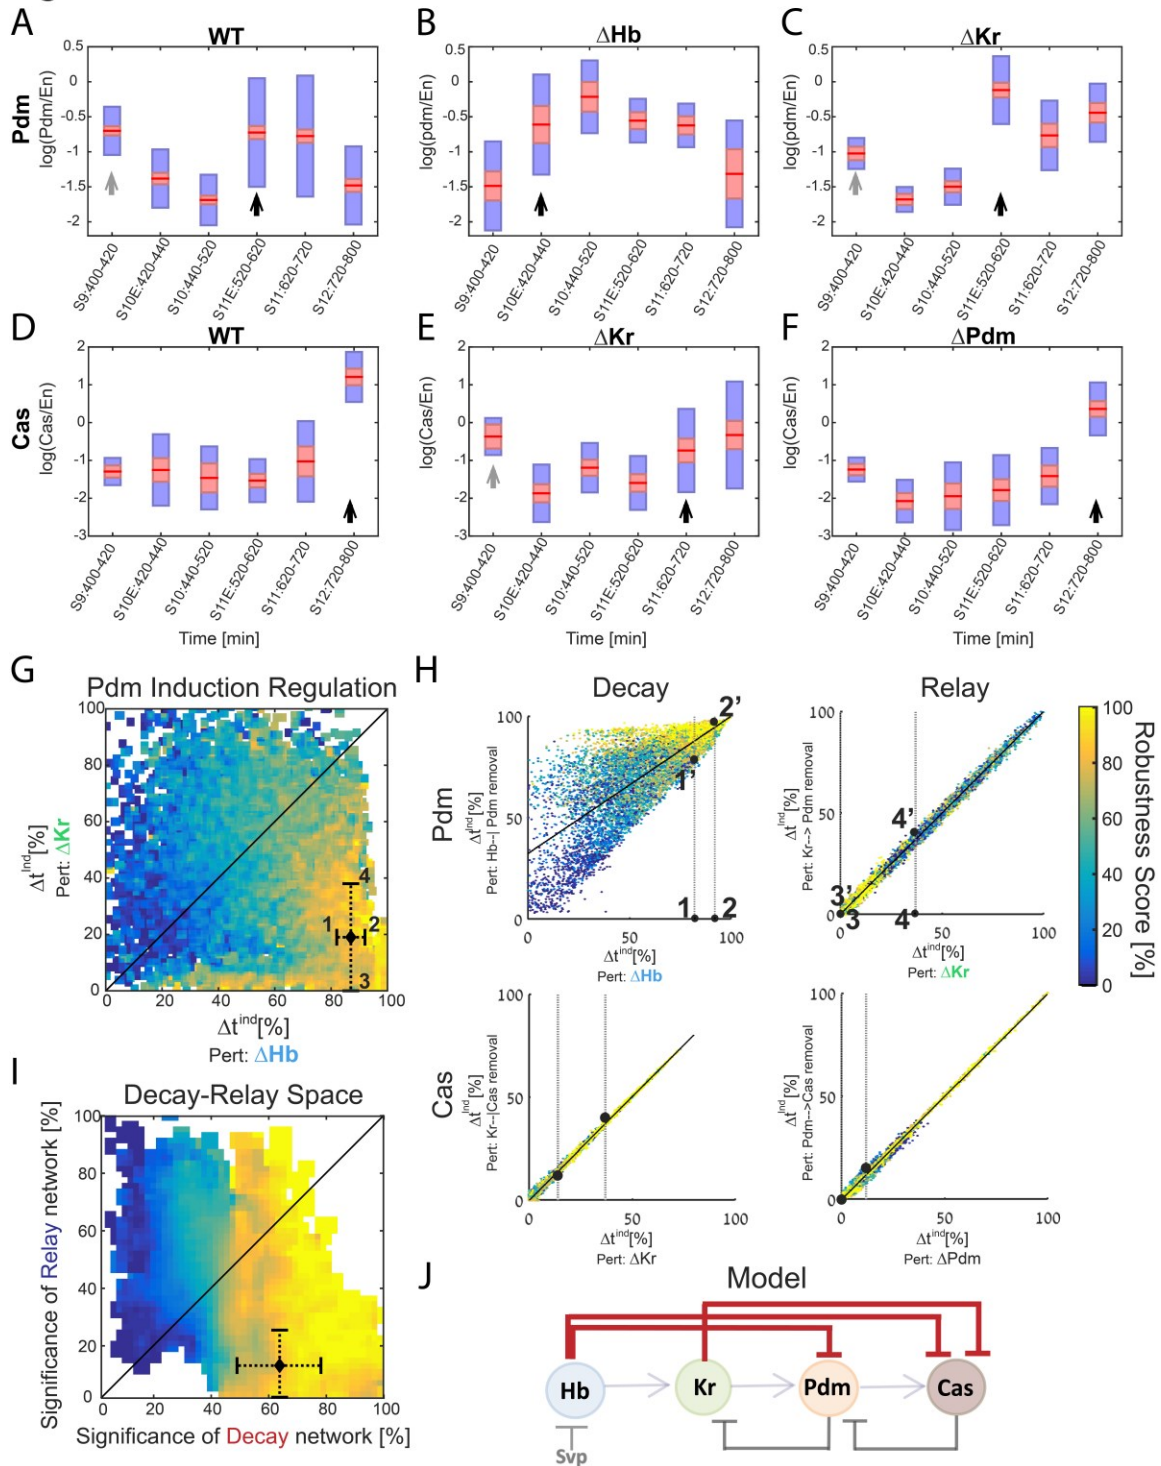

## Supplemental Information

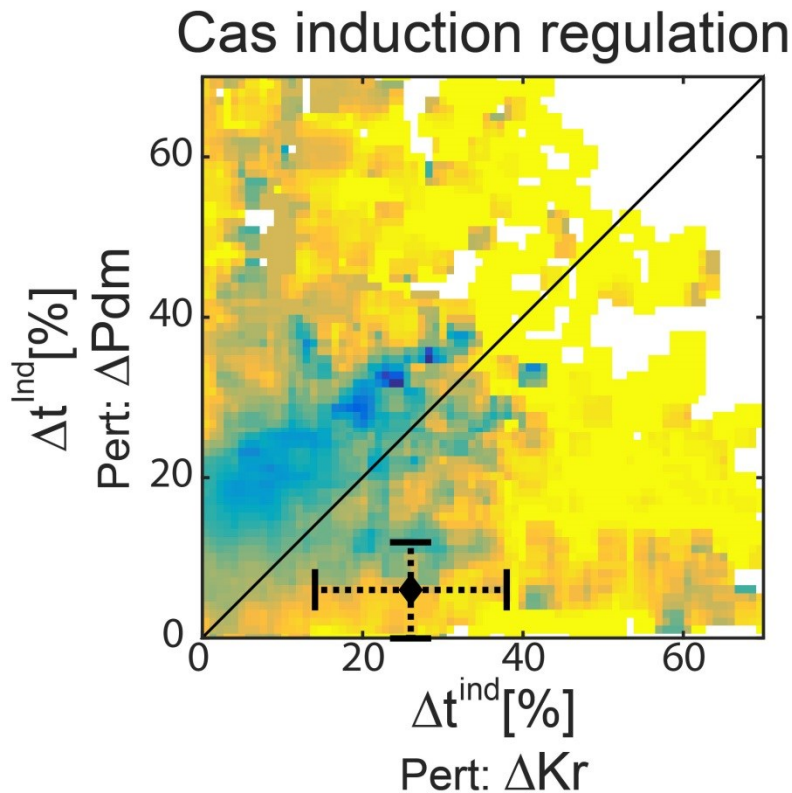

Figure S 1 - All consistent circuits, as described in Figures 1-2 above, were considered. Each consistent circuit was scored by measuring the change in Cas induction times following deletion of Kr or deletion of Pdm. These values were used to uniquely position each circuit in the Kr-Pdm sensitivity space. Color-coding circuits based on their robustness score, as in Figure 2E, shows that robust circuits are more often found in the region in the Kr-Pdm sensitivity space, in which Cas induction time is more sensitive to Kr deletion. Position of the in-vivo timer in the Cas Pdm-Kr sensitivity space: The measured changes in Cas induction time following Kr and Pdm deletions were used to position the in-vivo circuit in the Pdm-Kr sensitivity space, as described for the simulated data Figure 3B (Black diamond). Error bars are based on the experimental temporal resolution (see Methods for details).

| TTF combination | Neuronal fate | Reference genotype       |
|-----------------|---------------|--------------------------|
| Hb              | 1,2           | WT, const Hb, ΔHb        |
| Hb,Kr           | 1,2           | WT, const Hb, ΔHb        |
| Kr              | 3             | WT, ΔHb                  |
| Kr,Pdm          | 3             | WT,const Kr              |
| Pdm             | 4             | WT, ΔPdm                 |
| Pdm,Cas         | 5             | WT, ΔPdm, ΔCas,const Pdm |
| Cas             | IN            | const Cas                |
| Hb,Pdm          | 1,2           | const Pdm                |

**Table S 1 – Neuronal fates induced by TTF co-expression in the NB. Neuronal fates for co-expression of TTFs in the NB at time of division were deduced from lineages described in Figure 1D. For every combination, the resulting fate is specified along with the genotypes from Figure 1D from which fate was deduced. Constitutive expression genotypes are denoted by const and deletions by Δ.**

| Figure, panel | Number of NB7-1s per box left to right         |
|---------------|------------------------------------------------|
| 4,C           | 105,100 ,48, 81, 103, 90, 70,70,134,116, 63,77 |
| 4,E           | 9,19,27,31,28,20,7,3                           |
| 5,A           | 105,100, 129 ,263 ,320 ,140                    |
| 5,B           | 31,28,22,26,22,16                              |
| 5,C           | 20,19,40 ,81 ,34 ,34                           |
| 5,D           | 19,35,18,38,28,35                              |
| 5,E           | 9,39,36,36,47,55                               |
| 5,F           | 17,27,27,40,27,44                              |

**Table S 2 – Number of NB7-1s per box**

## Model equations and Parameters

The molecular interactions driving the embryonic NB timer have been well described (Grosskortenhaus et al., 2005; Grosskortenhaus et al., 2006; Isshiki et al., 2001; Tran and Doe, 2008). These interactions appear to integrate the two core timers discussed in the main text: some genetic interactions are compatible with the decay-based timer, while other interactions are compatible with relay-based timer. Based on this existing knowledge, we formulated a mathematical model capturing the described interactions. This model allows for variable influence of both timer types of based on parameter choice. The following ODEs describe our TTF timer model:

$$(7) \frac{d[hb]}{dt} = \theta(t - t_0)\beta_{hb} - \alpha_{hb}[hb]$$

$$(8) \frac{d[kr]}{dt} = \beta_{kr}H_A([hb])H_R([pdm]) + \theta(t - t_0)\beta_{kr}^{basal}H_R([pdm]) - \alpha_{kr}[kr]$$

$$(9) \frac{d[pdm]}{dt} = \beta_{pdm} H_A([kr]) H_R([hb]) H_R([cas]) + \beta_{pdm}^{basal} H_R([hb]) H_R([cas]) - \alpha_{pdm} [pdm]$$

$$(10) \frac{d[cas]}{dt} = \beta_{cas} H_A([pdm]) H_R([hb]) H_R([kr]) + \beta_{cas}^{basal} H_R([hb]) H_R([kr]) - \alpha_{cas} [cas]$$

Notations and additional parameters:

$\theta(t - t_0)$  it a temporal step function which allows the production of hb only at  $t < t_0$ .

For the TTF  $i$ ,  $\beta_i$  is  $i$ 's production rate,  $\alpha_i$  is  $i$ 's degradation rate,  $\beta_i^{basal}$  is  $i$ 's basal production rate in the absence of any activators.

$H_A([i]) = \frac{1}{1 + (\frac{K_{i,j}}{[i]})^{n_i}}$ , is a hill function representing transcriptional activation by the TTF  $i$  of gene  $j$ . With  $K_{i,j}$ , the  $K_D$  for  $i$  activity on  $j$ , and  $n_i$ ,  $i$ 's hill coefficient.

$H_R([i]) = \frac{1}{1 + (\frac{[i]}{K_{i,j}})^{n_i}}$ , is a hill function representing transcriptional repression by the TTF  $i$ .

With  $K_i$ , the  $K_D$  for  $i$  activity, and  $n_i$ ,  $i$ 's hill coefficient. Additional model parameters are the  $Tr_i$ , which are the thresholds. Only when the concentration of  $i$ ,  $[i]$ , is above  $Tr_i$ ,  $i$  is considered to be “on”.  $t_{end}$  is the duration of the simulation. We solve this full set of ODEs numerically using a standard MATLAB ODE solver. The model equations insure the dominance of the repressors: a gene will not be expressed in the presence of its repressor even if an activator is also present. This property which stems from the multiplication of the production rates by the  $H_A([i])H_R([i])$  term was observed experimentally (Grosskortenhaus et al., 2005; Grosskortenhaus et al., 2006; Isshiki et al., 2001; Nakajima et al., 2010; Tran and Doe, 2008; Tran et al., 2010).



| Parameter                             | Units           | Range or values                                                              |
|---------------------------------------|-----------------|------------------------------------------------------------------------------|
| $t_0$                                 | $t[\text{min}]$ | 20 or 50                                                                     |
| $t_{end}$                             | $t[\text{min}]$ | 280                                                                          |
| $\beta_i$                             | $t^{-1}C$       | [1, 1000]                                                                    |
| $\beta_{kr}^{basal}$                  | $t^{-1}C$       | 0 for WT and all perturbations except Hb deletion. [1, 1000] for Hb deletion |
| $\beta_i^{basal}, i \in \{Pdm, Cas\}$ | $t^{-1}C$       | [1,800]                                                                      |
| $\alpha_i$                            | $t^{-1}$        | [0.1,10]                                                                     |
| $K_{i,j}$                             | $C^{n_w}$       | [0.1,2]                                                                      |
| $Tr_i$                                | C               | 2                                                                            |
| $n_i$                                 | -               | 5                                                                            |

**Table S 3 – Parameter ranges used when searching for consistent sets. Drawing was done from a log-uniform distribution on indicated ranges. When no specific TTF is indicated for the parameter, it is the same for all four TTFs.**

## References

- Grosskortenhaus, R., Pearson, B.J., Marusich, A., Doe, C.Q., 2005. Regulation of temporal identity transitions in *Drosophila* neuroblasts. *Dev Cell* 8, 193-202.
- Grosskortenhaus, R., Robinson, K.J., Doe, C.Q., 2006. Pdm and Castor specify late-born motor neuron identity in the NB7-1 lineage. *Genes Dev* 20, 2618-2627.
- Isshiki, T., Pearson, B., Holbrook, S., Doe, C.Q., 2001. *Drosophila* neuroblasts sequentially express transcription factors which specify the temporal identity of their neuronal progeny. *Cell* 106, 511-521.
- Nakajima, A., Isshiki, T., Kaneko, K., Ishihara, S., 2010. Robustness under functional constraint: the genetic network for temporal expression in *Drosophila* neurogenesis. *PLoS Comput Biol* 6, e1000760.
- Tran, K.D., Doe, C.Q., 2008. Pdm and Castor close successive temporal identity windows in the NB3-1 lineage. *Development* 135, 3491-3499.
- Tran, K.D., Miller, M.R., Doe, C.Q., 2010. Recombineering Hunchback identifies two conserved domains required to maintain neuroblast competence and specify early-born neuronal identity. *Development* 137, 1421-1430.
